# Supplementary material for: Glibenclamide attenuates brain edema after intracerebral hemorrhage by improving blood–brain barrier integrity glymphatic transport and tissue poroelastic properties
Source: Research Square preprint supplement (doi:10.21203/rs.3.rs-8571654/v1), 2026-01-14
Supplement: Supplementary file 1 [file c4480b571756efc85229db9c.docx]

**Supplementary Materials**

**1.Indentation hold test**

After weighing, the rats were anesthetized via intraperitoneal injection of 2% pentobarbital sodium at a dose of 0.3 ml/100 g. The rat’s back was stabilized with the left hand while the head was secured with the fingers, and the cervical spinal cord was rapidly severed using scissors or a guillotine. Immediately following euthanasia, the brain was carefully extracted. The fresh brain tissue was placed in a pre-cooled rat brain mold and coronally sectioned at the needle entry site with a blade to create a smooth hematoma surface. The occipital lobe was trimmed to produce a flat base. The prepared ICH brain tissue was then positioned in a 6 cm culture dish, with the hematoma surface facing upward and the occipital lobe downward, in a dish pre-filled with cold (4 °C) artificial cerebrospinal fluid (aCSF). Samples were maintained moist without full immersion to prevent hydrostatic interference during indentation testing. The entire preparation-from euthanasia to the start of indentation—was completed within 10 minutes to minimize tissue degradation.

Indentation tests were conducted to characterize the poroelasticity of perihematomal brain tissue. To ensure consistency in indentation sites, standardized procedures were applied during both modeling and tissue preparation. During ICH induction, all animals received intracerebral injections at identical stereotaxic coordinates, resulting in hematomas at comparable brain regions across subjects. At brain harvesting, the cortical injection site served as a reference point, and coronal sectioning was performed using a standardized brain mold to achieve uniform anatomical levels. Indentations were consistently performed in the perihematomal region between the inner margin of the hematoma and the midline. A cylindrical indenter (2 mm diameter) was used to cover the target region without overlapping adjacent non-target tissue.

Each brain sample underwent a single indentation test, as the soft parenchyma permanently deforms after indentation, precluding repeat measurements in the same location. Considering the sample specificity and indenter dimensions, the indentation was performed at a fixed position for each sample to minimize structural damage and ensure data accuracy and reproducibility. The indentation system was calibrated prior to each experiment, and testing parameters-including temperature, loading rate, and indenter geometry-were maintained constant across all samples.

Tests were performed at room temperature (22 °C) using an electromagnetic biomaterials testing machine (ElectroForce 3200, TA Instruments, USA), with force and displacement sensor resolutions of 0.01 mN and 0.01 μm, respectively. Prior to testing, ICH brain tissue samples, soaked in pre-cooled aCSF, were placed on the machine base. The cylindrical indenter was brought into contact with the tissue, then advanced at 6 mm/s to a displacement of 0.6 mm within 0.1 s. The indenter was held at this depth until force equilibrium was reached (isometric hold), for a maximum duration of 350 s. As samples remained immersed in aCSF, their biological condition was considered stable throughout the test.

**2.Poroelastic modeling**

Materials that follow poroelastic theory exhibited time-dependent relaxation. This behavior arised from the frictional resistance of fluid moving through the porous network of the material. In simple terms, viscoelasticity originated from conformational changes of the solid network, whereas poroelasticity resulted from the flow or migration of the interstitial fluid.

When brain tissue was deformed by a cylindrical indenter of radius R, the resulting response force *F(t)* was time-dependent and relaxes over time. Based on poroelastic theory, Hu et al. employed the finite element method to derive an approximate solution for *F(t)* , expressed as:

(1)

where and denoted the forces at the onset and at equilibrium of the poroelastic relaxation process, respectively. The parameter represented the characteristic length scale of indentation, defined as the contact radius *()*, and *D* was the poroelastic diffusion coefficient describing fluid transport through the solid network. The characteristic poroelastic relaxation time was given by =/D, which depended on the indentation length scale. This formulation enabled quantitative characterization of the poroelastic relaxation behavior of soft materials and allows estimation of the diffusion coefficient *D.*
